# Supplementary material for: Pediatric Chikungunya-Associated Encephalitis in Itacoatiara, Brazilian Amazon: A Case Report
Source: Preprints.org preprint supplement (doi:10.20944/preprints202406.0287.v1), 2024-06-05
Supplement: Supplementary file 1 [file supplementary]

**Supplementary Table 1.** Laboratory exams and neuroimaging findings in a 9-year-old male with encephalitis caused by chikungunya.

| **DOS** | 10th | 14th | 1tht | 17th | 22nd | Normal range |
| --- | --- | --- | --- | --- | --- | --- |
| **DHA** | -- | 1st | 2nd | 4th | 10th |
| Hematocrit | 36.3 | 35.9 | 39.5 | 32.7 | 35.1 |  |
| Hemoglobin [g/dL] | 11.7 | 11.7 | 12.9 | 10.7 ↓ | 11.3 |  |
| White blood cell count | 10.3 | 12.9 ↑ | 14.6 ↑ | 14.5 ↑ | 8.7 | [103/μL] |
| Neut count [%] | 68 | 75 ↑ | 80 ↑ | 82 ↑ | 62 |  |
| Lymph count [%] | 26 | 12 ↓ | 12 ↓ | 10 ↓ | 19 |  |
| Mono count [%] | 6 | 5 | 5 | 4 | 12 ↑ |  |
| Platelet count | 379 | 444 ↑ | 400 ↑ | 376 | 370 |  |
| Urea |  | 19 | 10 | 10 | 10 | 0.0-40 [mg/dL] |
| Serum creatinine |  | 0.5 | 0.4 | 0.3 | 0.5 | 0.3-1.0 [md/dL] |
| Na+ |  | 142 | 136 | 137 | 140 | 136-145 mEq/L |
| K+ |  | 4.6 | 4.7 | 4.3 | 4.8 | 3.6-5.0 mEq/L |
| C-reactive protein | negative | negative | 8 | 8 | negative | <5 mg/L |
| Plasmodium (BS) |  | negative |  |  |  |  |
| CSF analysis |  | RBC negative, WBC negative, glucose 63 mg/dL, protein 20, lactate 15, WCC 2 cells, microbiological studies negative |  |  |  |  |
| qPCR arboviruses (ChikV†±, DenV†±, ZikV†±, OroV†, MayV†) |  | Negative |  |  |  |  |
| qPCR other viruses (HSV-1, HSV-2, CMV, VZV, EBV, PVB19, WNV) ± |  | Negative |  |  |  |  |
| Urine type 1 | normal findings | normal findings | normal findings | leukocyte casts |  |  |
| Urine culture¬ |  |  |  | no signs of growth of bacteria |  |  |
| CT brain |  | normal findings |  |  |  |  |
| Brain MRI |  |  |  | normal findings |  |  |

ALT: alanine aminotransferase; AST: aspartate aminotransferase; BS: blood smears; ChikV: chikungunya virus; CMV: cytomegalovirus: CSF: cerebrospinal fluid; CT: computed tomography; DenV: dengue virus; DHA: day of hospital admission; DOS: day of onset of symptoms; EBV: Epstein–Barr virus; HSV-1: herpes simplex virus type 1; HSV-2: herpes simplex virus type 2; IgG: immunoglobulin G; IgM: immunoglobulin M; MayV: Mayaro virus; MCV: mean corpuscular volume; MCHC: mean corpuscular hemoglobin concentration; MRI: magnetic resonance imaging; OroV: Oropouche virus; PB19: primate erythroparvovirus 1 (Parvovirus B19); qPCR: real time reverse transcription polymerase chain reaction; RBC: red blood cells; VZV: varicella zoster virus; WBC: white blood cells; WCC: white cells count; WNV: West Nile virus; ZikV: Zika virus.

†: blood sample; ±: lumbar puncture sample; ¬: the urine sample was taken on D17 probably to investigate urinary casts (the result was only available after a 6-day culture in the lab)
